# Supplementary material for: Ursodeoxycholic acid for trans intestinal cholesterol excretion stimulation: a randomized placebo controlled cross-over study
Source: bioRxiv or medRxiv preprint supplement (doi:10.1101/2024.02.22.24303117), 2024-02-23
Supplement: Supplementary file [file media-1.pdf]

## Supplemental Methods

### *Hydrophobicity index*

To calculate the total plasma bile acid hydrophobicity index (HI) we used the previously published HI for each individual bile acid<sup>1</sup> and multiplied them by the relative concentration of each bile acid.

### *Formula:*

Total plasma bile acid HI=

((bile acid 1 concentration \* bile acid 1 HI)/ total bile acid amount)

+ (bile acid 2 concentration \* bile acid 2 HI)/ total bile acid amount)

+ ...

+ (bile acid 14 concentration \* bile acid 14 HI)/ total bile acid amount))

### Reference

1. Heuman DM. Quantitative estimation of the hydrophilic-hydrophobic balance of mixed bile salt solutions. *J Lipid Res.* 1989;30(5):719-730. doi:[https://doi.org/10.1016/S0022-2275\(20\)38331-0](https://doi.org/10.1016/S0022-2275(20)38331-0)
